# Supplementary material for: HS–SPME–GC–MS combined with machine learning methods for screening volatile quality indicators in Hypericum perforatum L.
Source: Royal Society of Chemistry journal article supplement (doi:10.1039/d4nj04845h), 2025-01-01

**HS-SPME-GC-MS combined with machine learning methods for screening  
volatile quality indicators in *Hypericum perforatum* L.**

Zhiyong Zhang <sup>1#</sup>, Jiahe Qian <sup>1</sup>, Zehua Ying <sup>1</sup>, Zhenhao Tang <sup>1</sup>, Zheng Li <sup>1,2</sup>, Wenlong  
Li <sup>1,2\*</sup>

<sup>1</sup> College of Pharmaceutical Engineering of Traditional Chinese Medicine, Tianjin  
University of Traditional Chinese Medicine, Tianjin, 301617, China;

<sup>2</sup> Haihe Laboratory of Modern Chinese Medicine, Tianjin, 301617, China;

---

\* Corresponding author. Tel.: +86 22 59596814; fax: +86 22 59596814.

E-mail address: [wshlwl@tjutcm.edu.cn](mailto:wshlwl@tjutcm.edu.cn) (W. Li).

# Joint first authors.

Fig. S1 Optimization of experimental conditions for HS-SPME-GC-MS of *Hypericum perforatum* L.

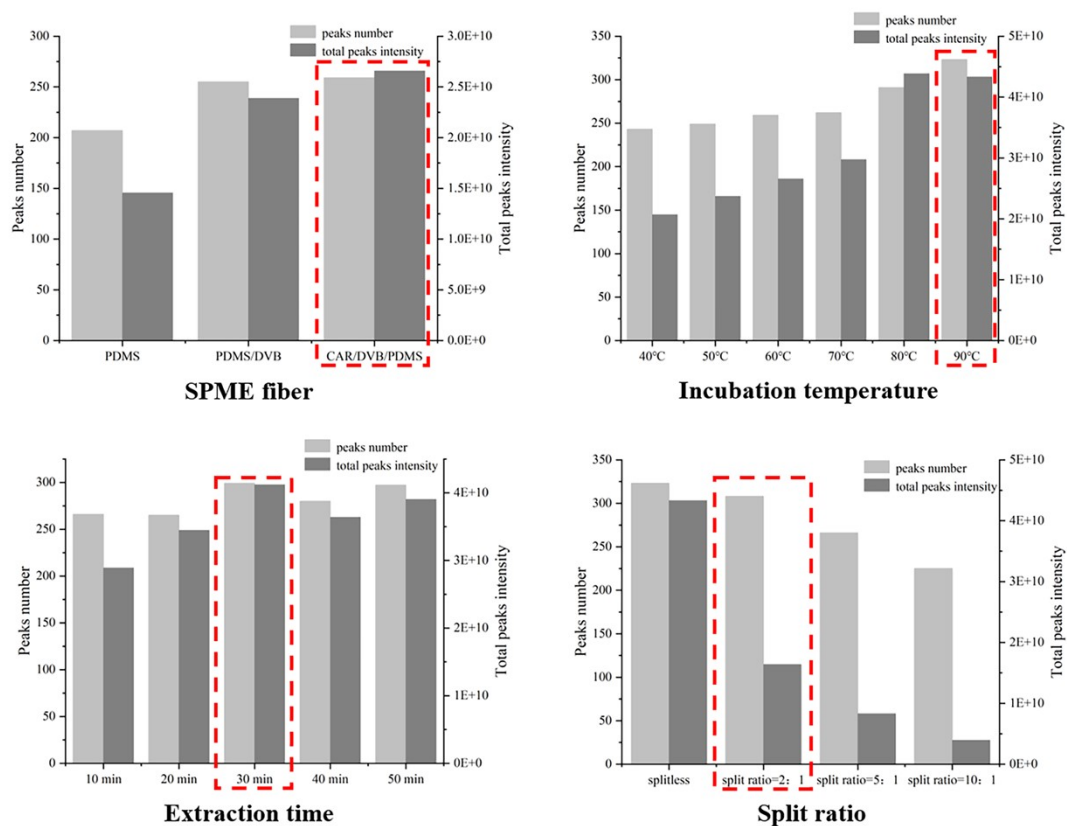

Fig. S2 The total ion current (TIC) chromatograms of different parts of *Hypericum perforatum* L.(A), Preliminary identification of compounds based on the matching degree of MS fragments (B), calculation of compound RI based on the mixed standard of normal alkane C<sub>8</sub>-C<sub>20</sub> (C).

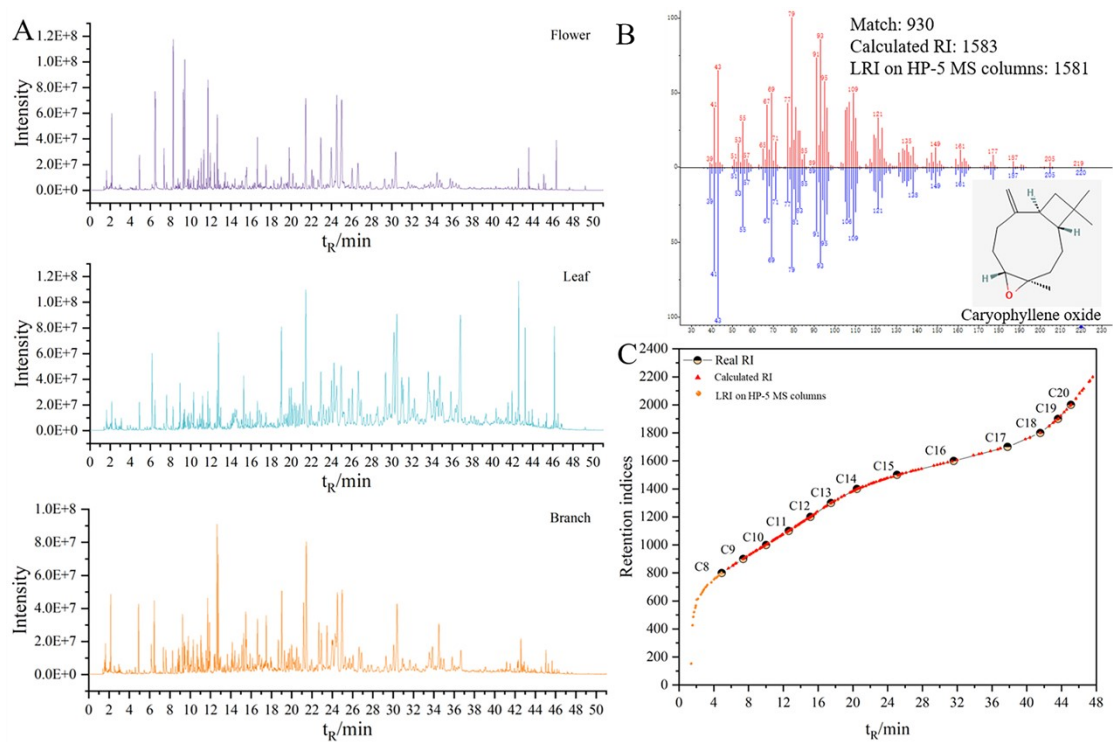

Fig. S3 Screening of differential compounds in different parts of *Hypericum perforatum* L. (a-c: Volcano plots; d-f, OPLS-DA model)

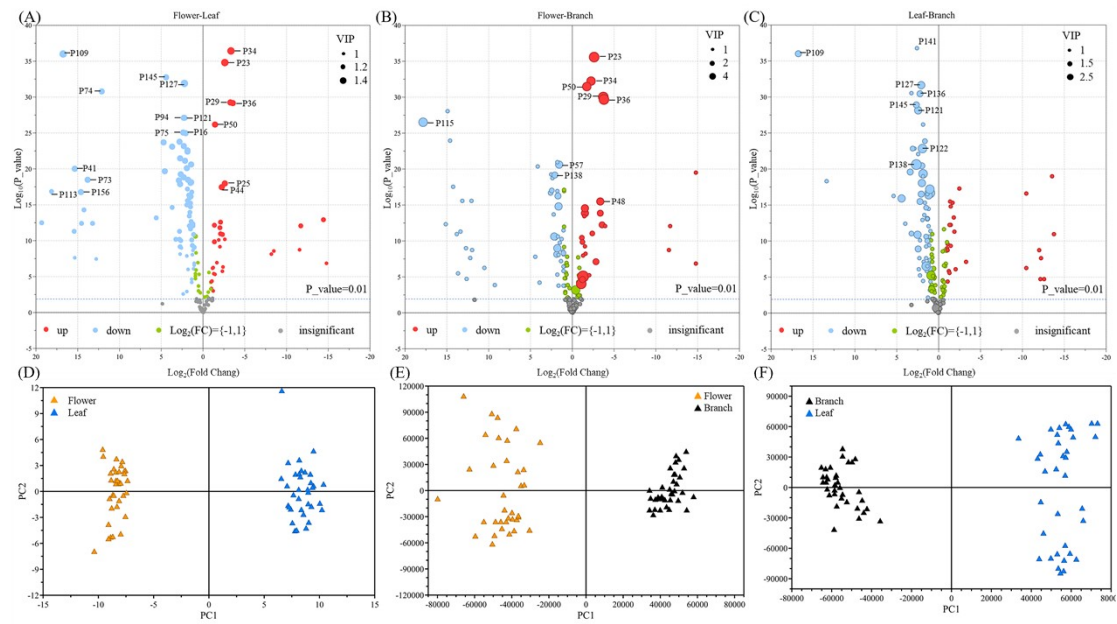

Fig. S4 PPI network of total gene target

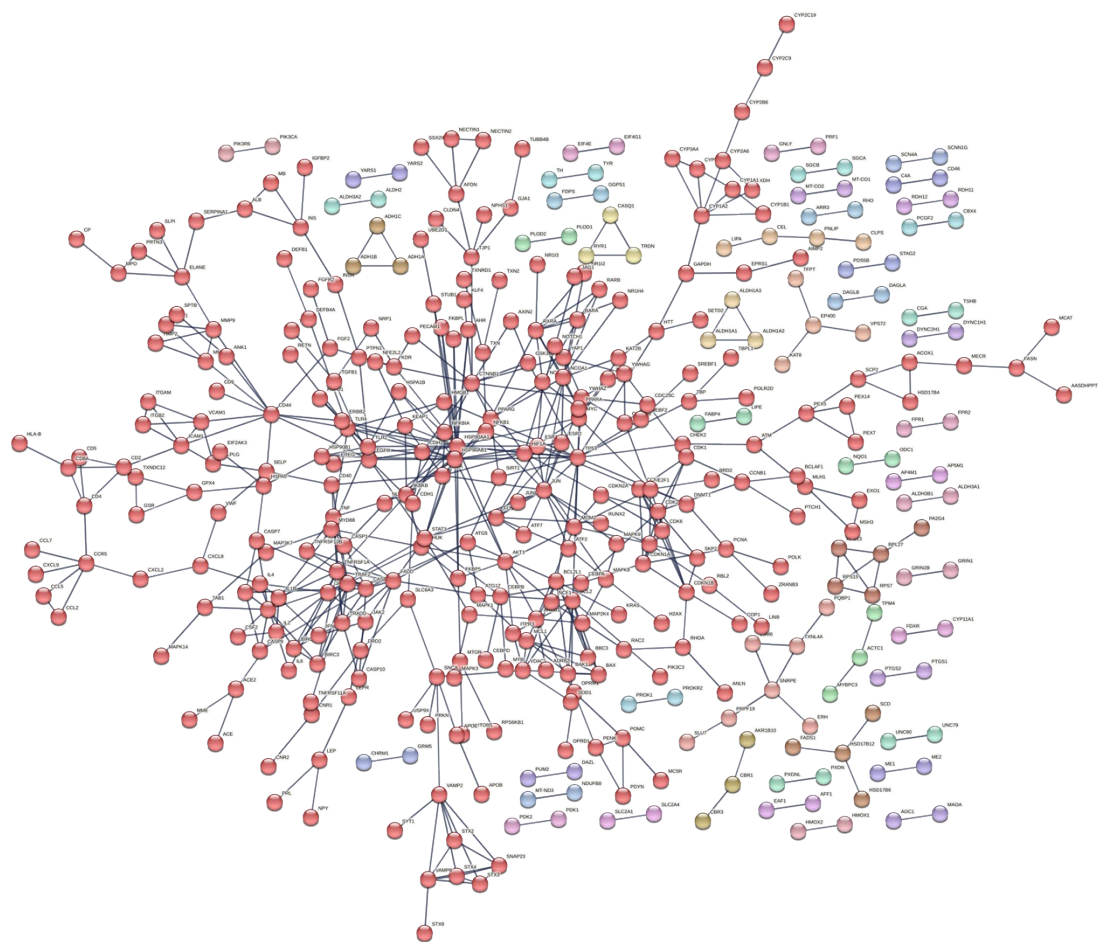

Fig. S5 PPI network of core gene target

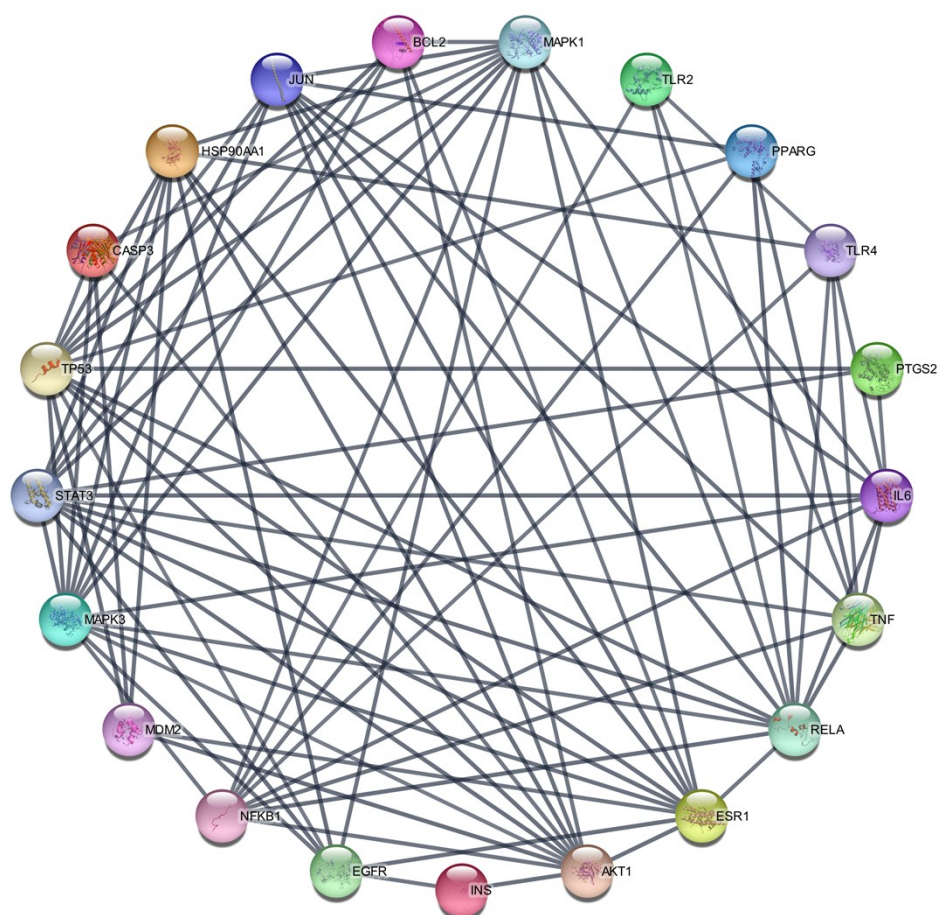

Fig. S6 KEGG pathway enrichment analysis of 24 core gene

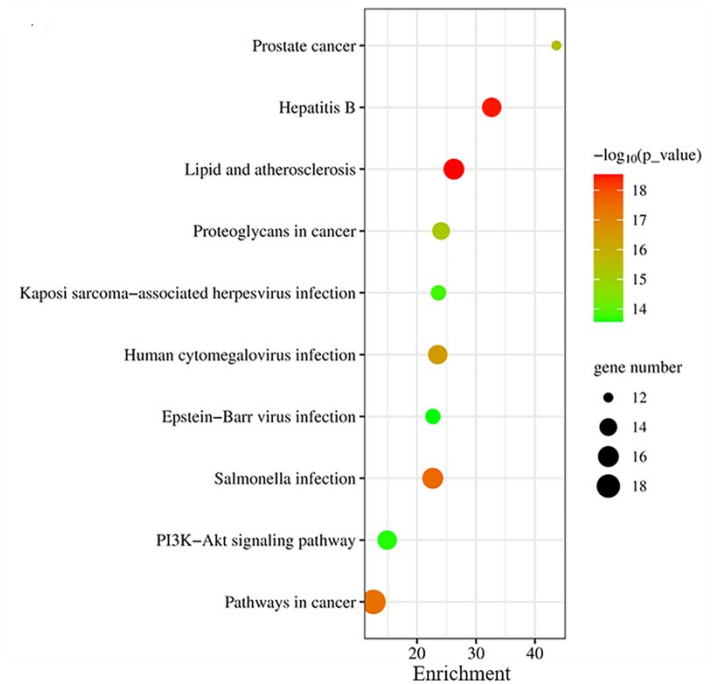

Fig. S7 Division of datasets. (A: Kennard Stone; B, Stratified sampling)

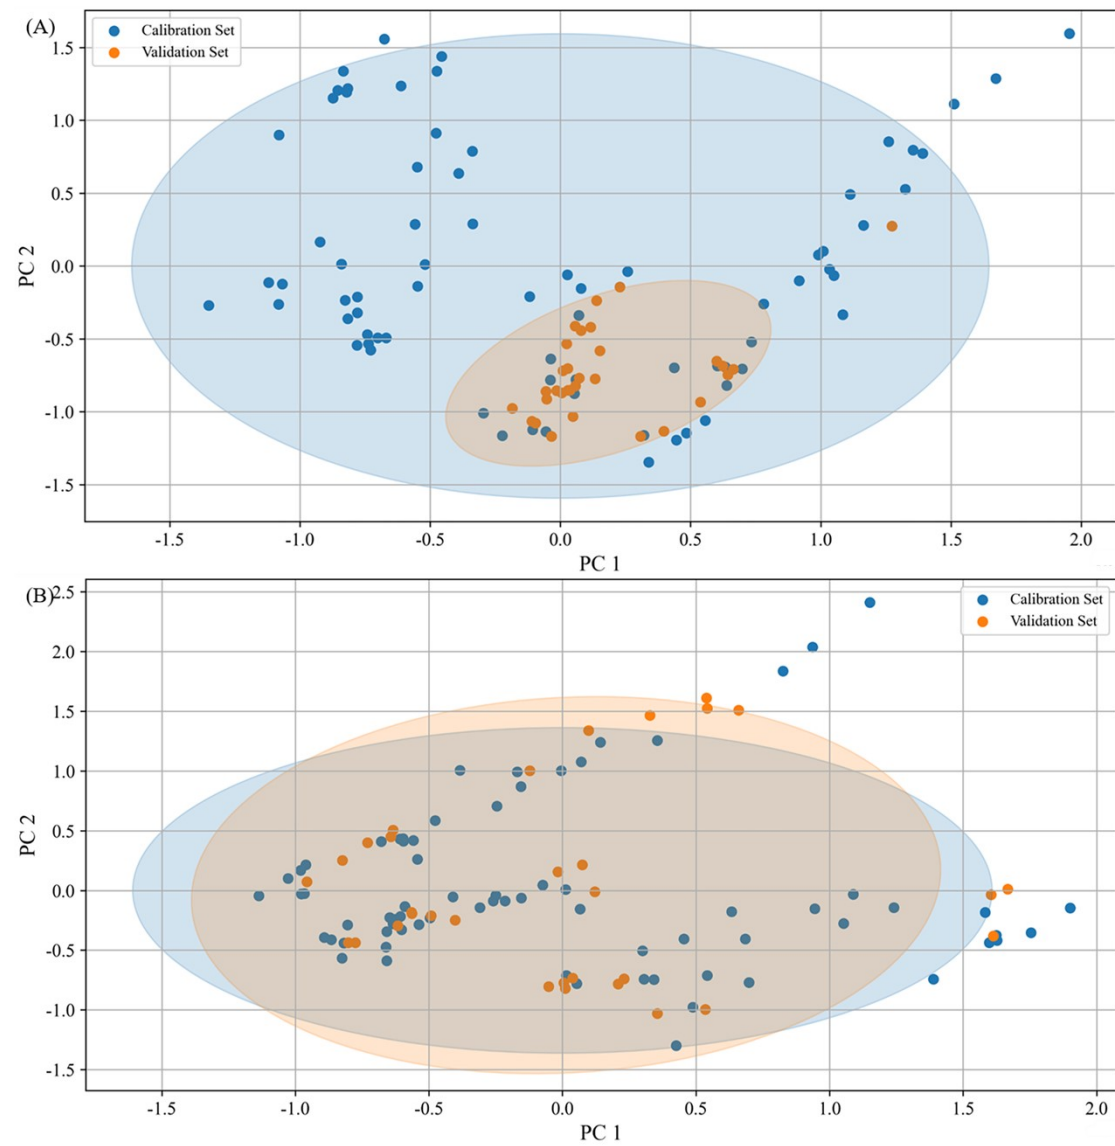

Supplement: d4nj04845h1.pdf [file d4nj04845h1.pdf]
